# Supplementary material
Source: Springer Nature journal article supplement (https://www.springermedizin.de/resource/supplementary/13002_2010_198_MOESM3_ESM.pdf/9627364)

Fruit/Seed  
4%

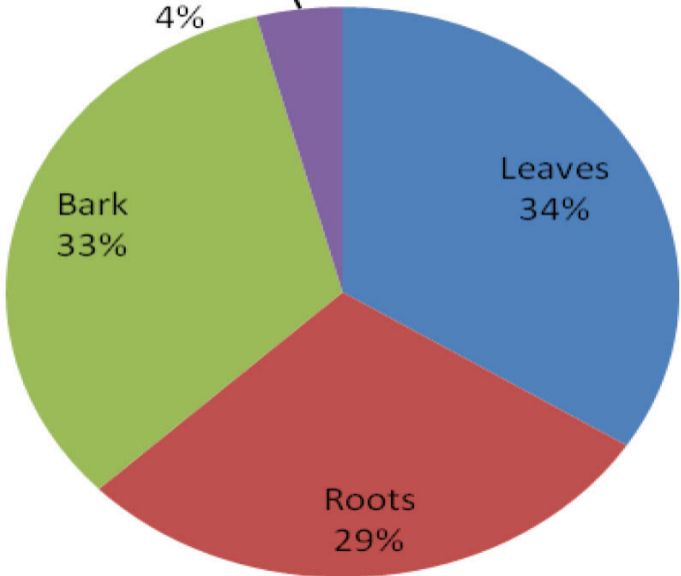

Leaves  
34%

Bark  
33%

Roots  
29%

Supplement: MOESM3 [file 9627364]
